# Supplementary material
Source: PubMed Central journal article supplement (PMC9074467)

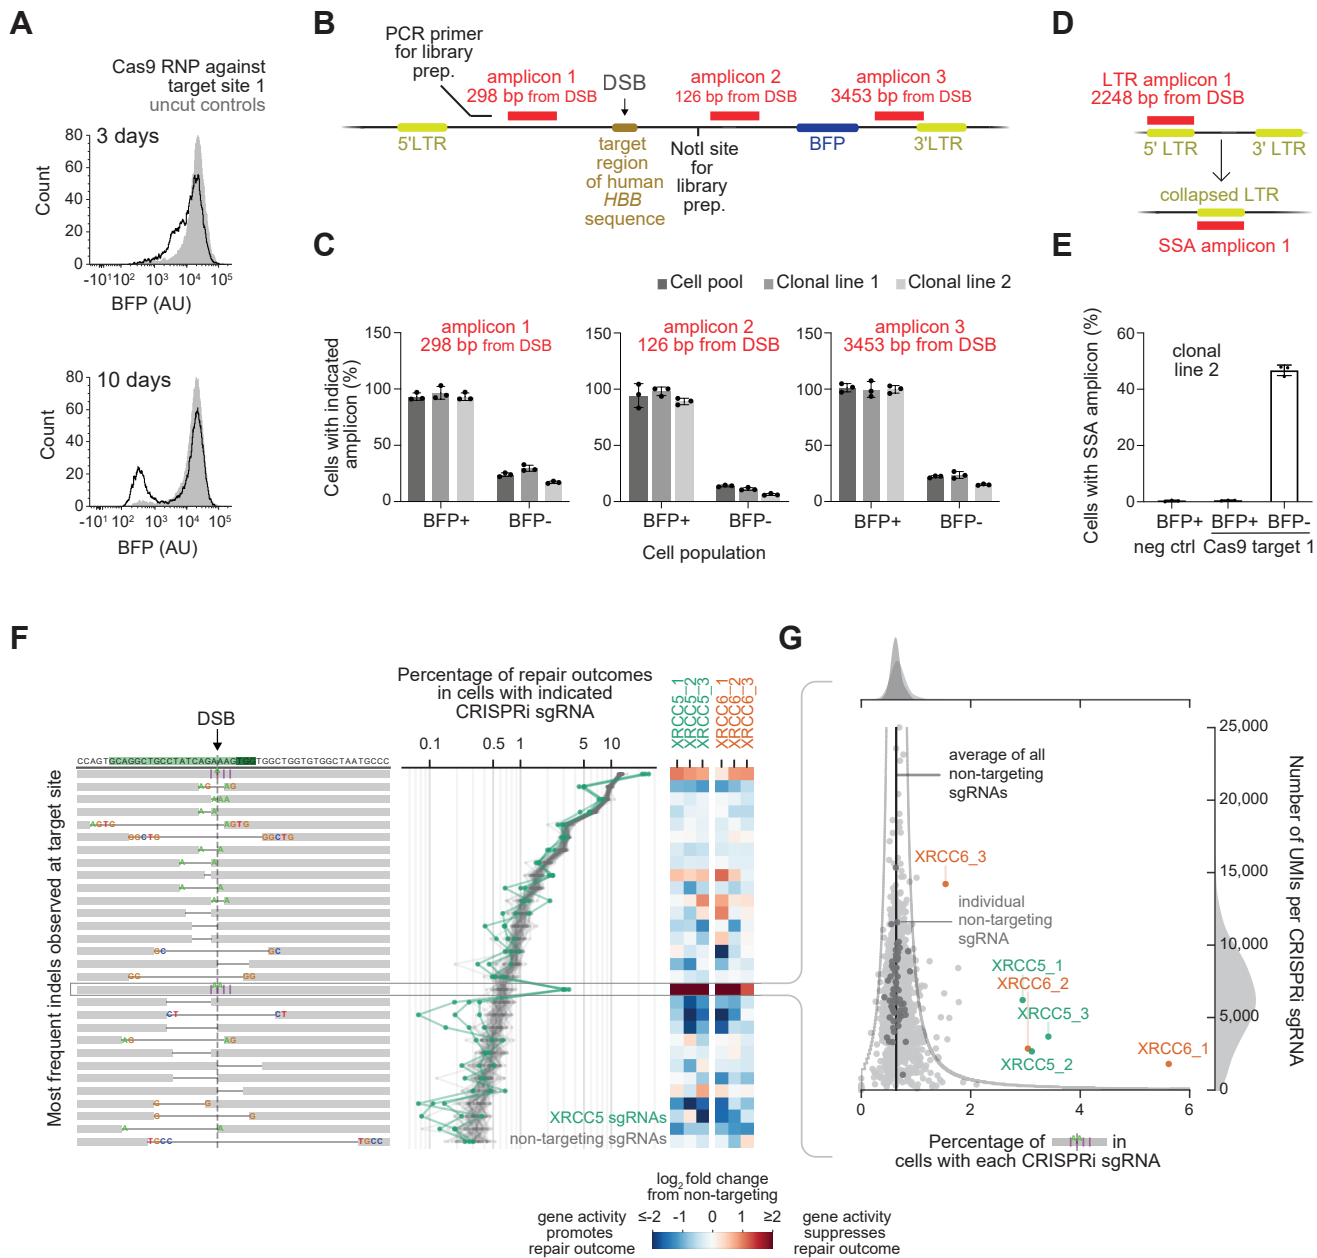

Supplement: NIHMS1750972-supplement-2.pdf [file NIHMS1750972-supplement-2.pdf]

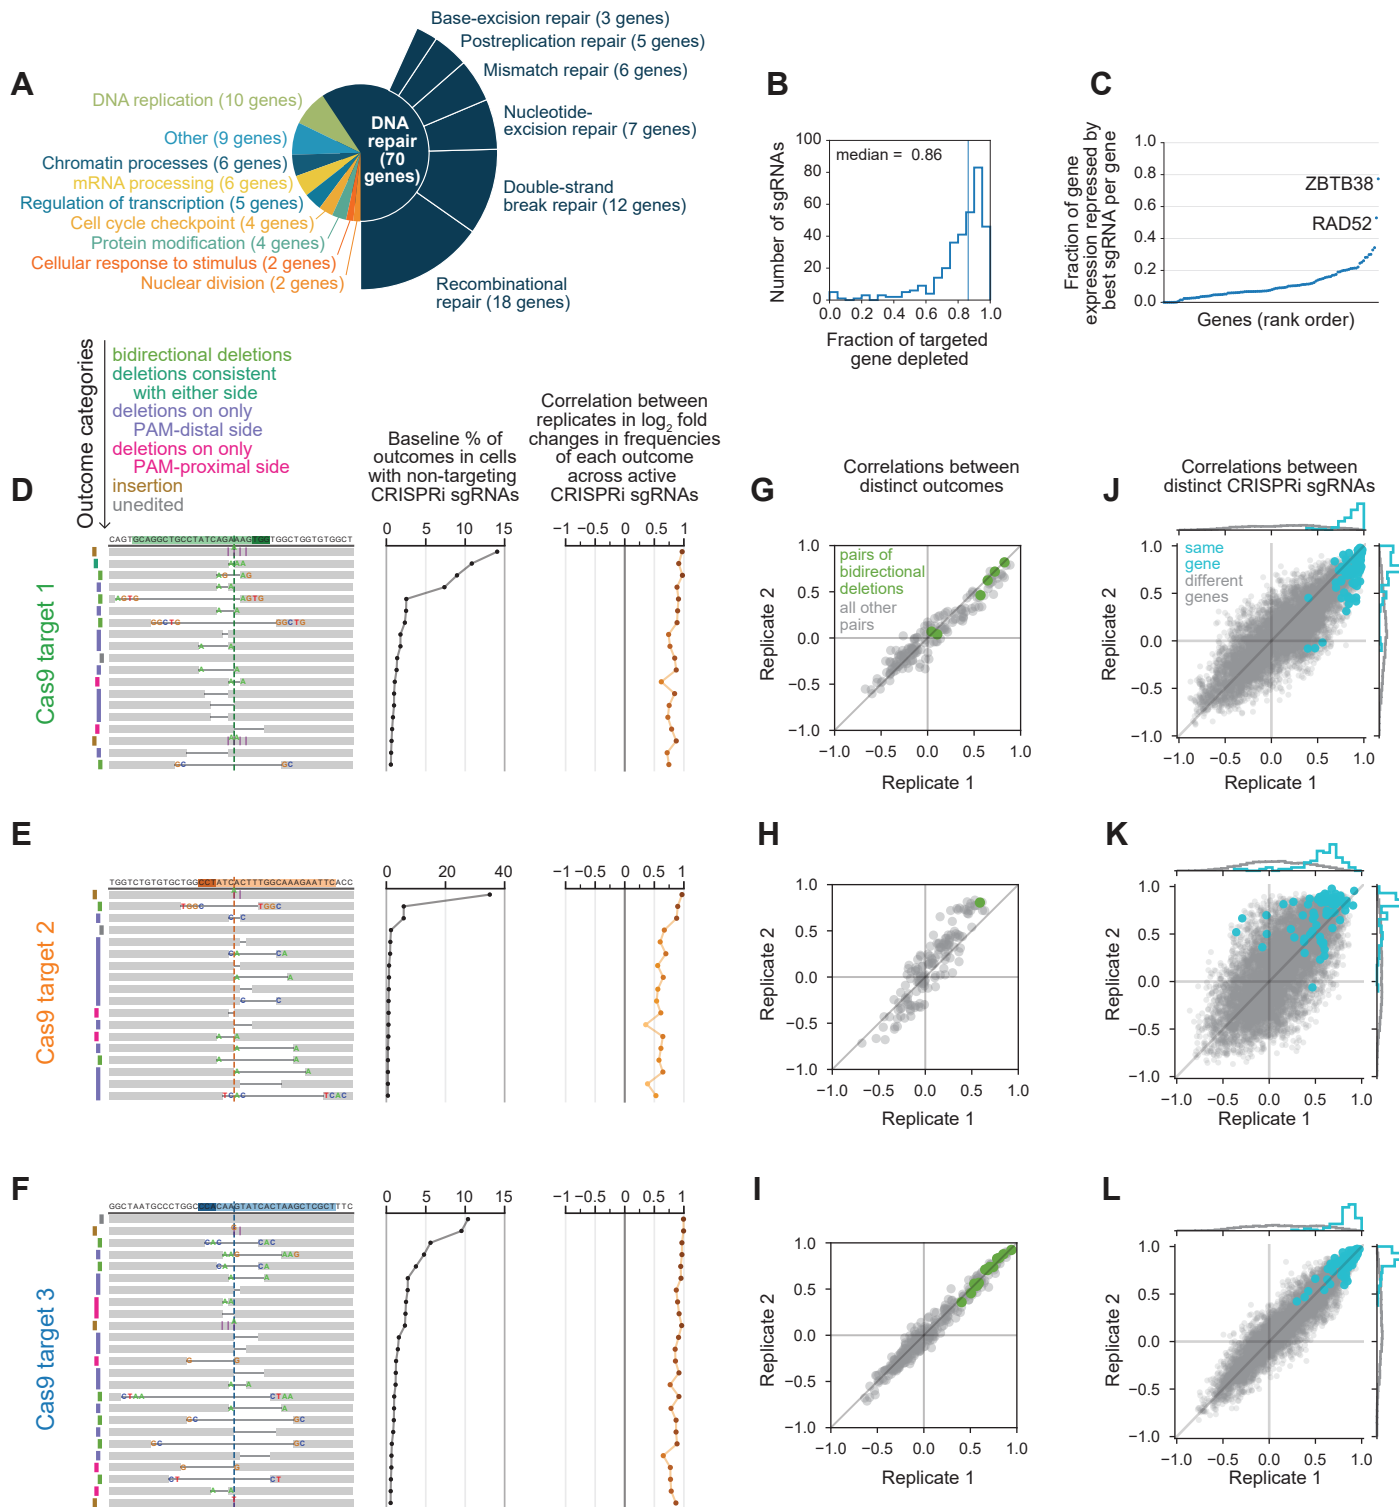

Supplement: NIHMS1750972-supplement-3.pdf [file NIHMS1750972-supplement-3.pdf]

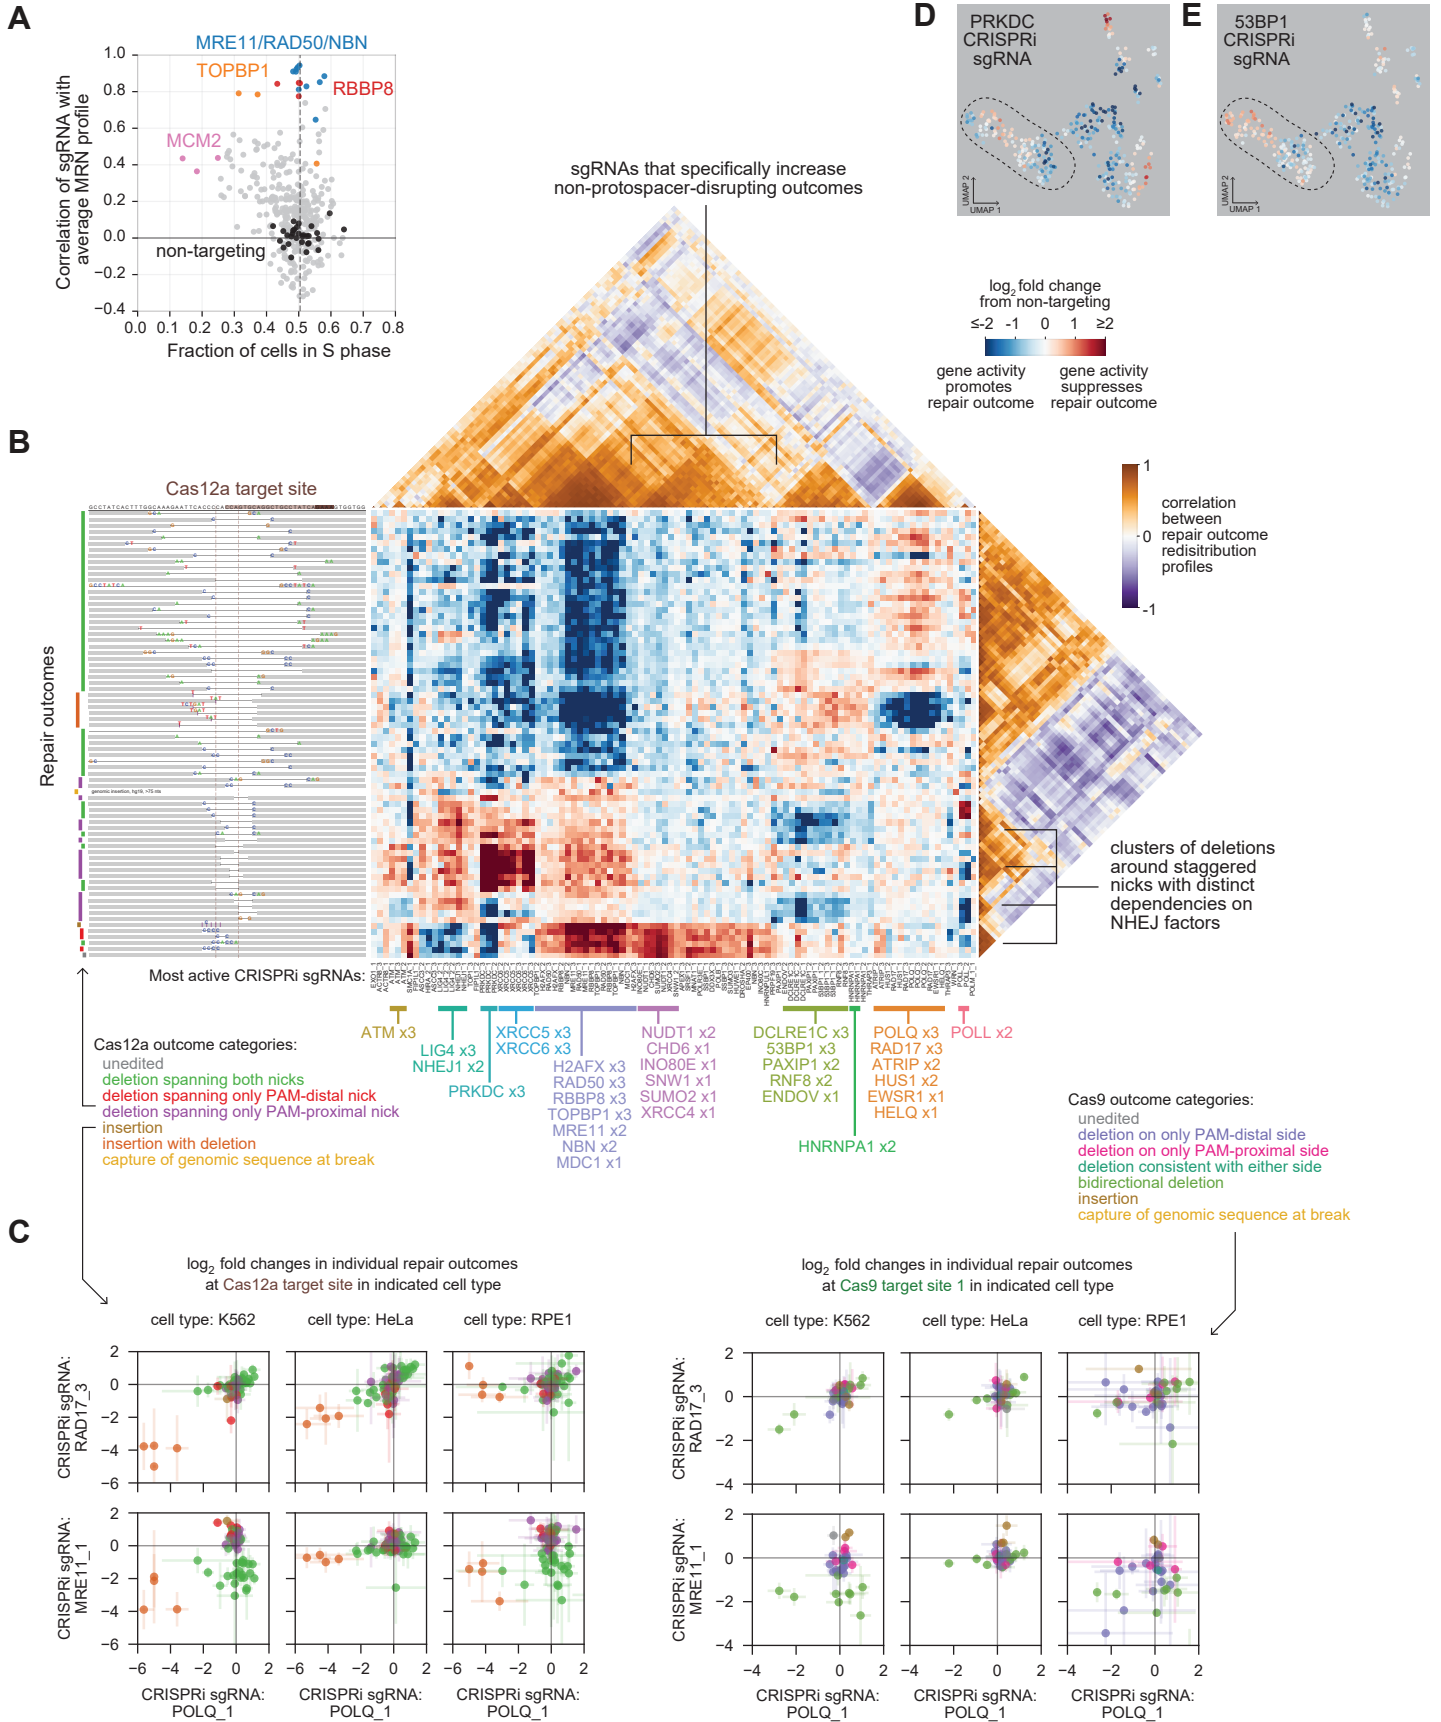

Supplement: NIHMS1750972-supplement-6.pdf [file NIHMS1750972-supplement-6.pdf]

**A**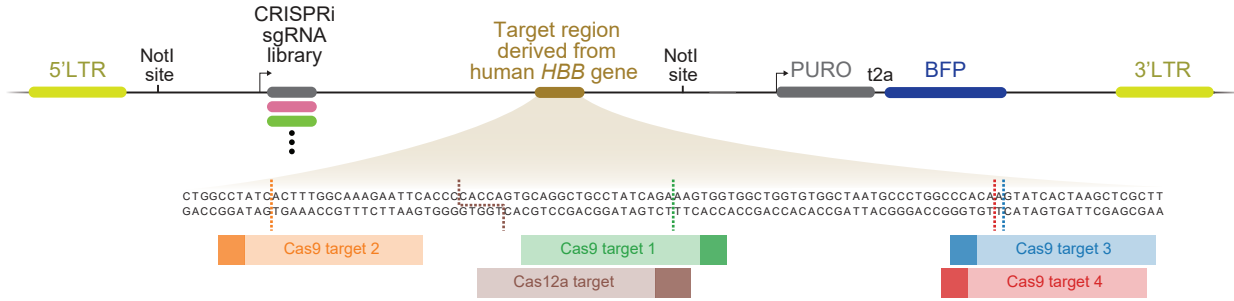**B**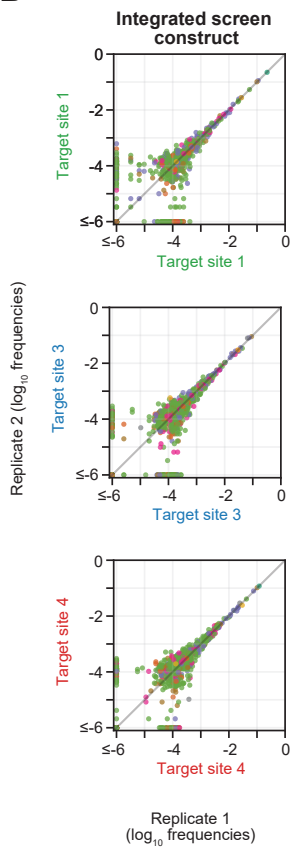**C**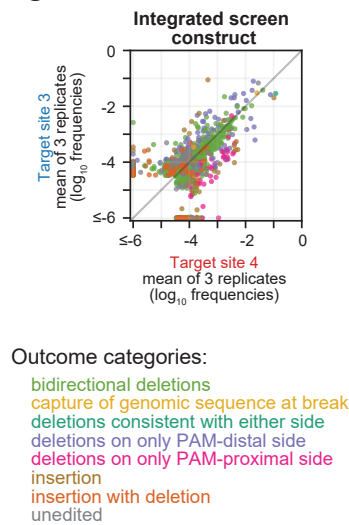**D**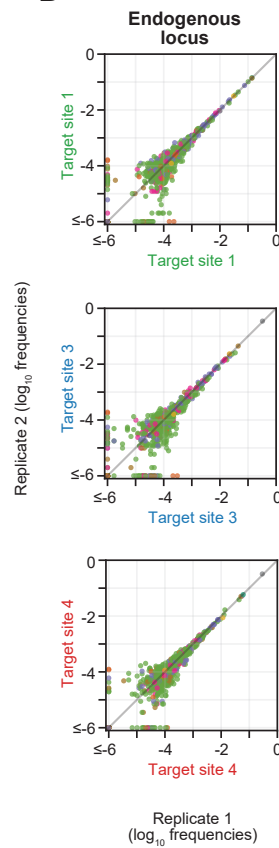**E**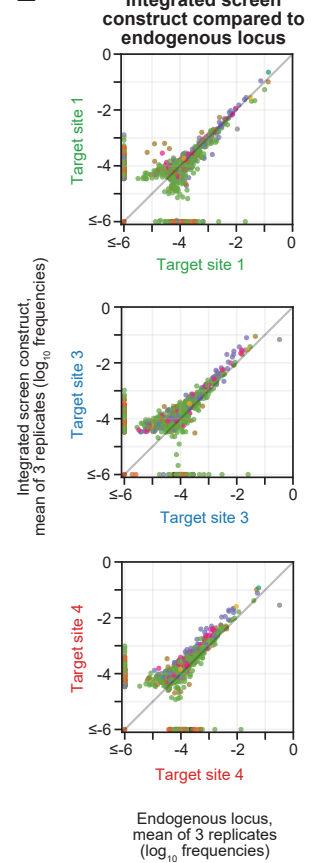**F**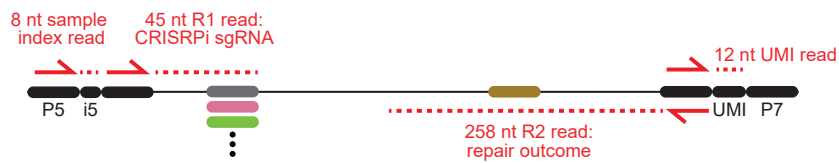

Supplement: NIHMS1750972-supplement-P100.pdf [file NIHMS1750972-supplement-P100.pdf]

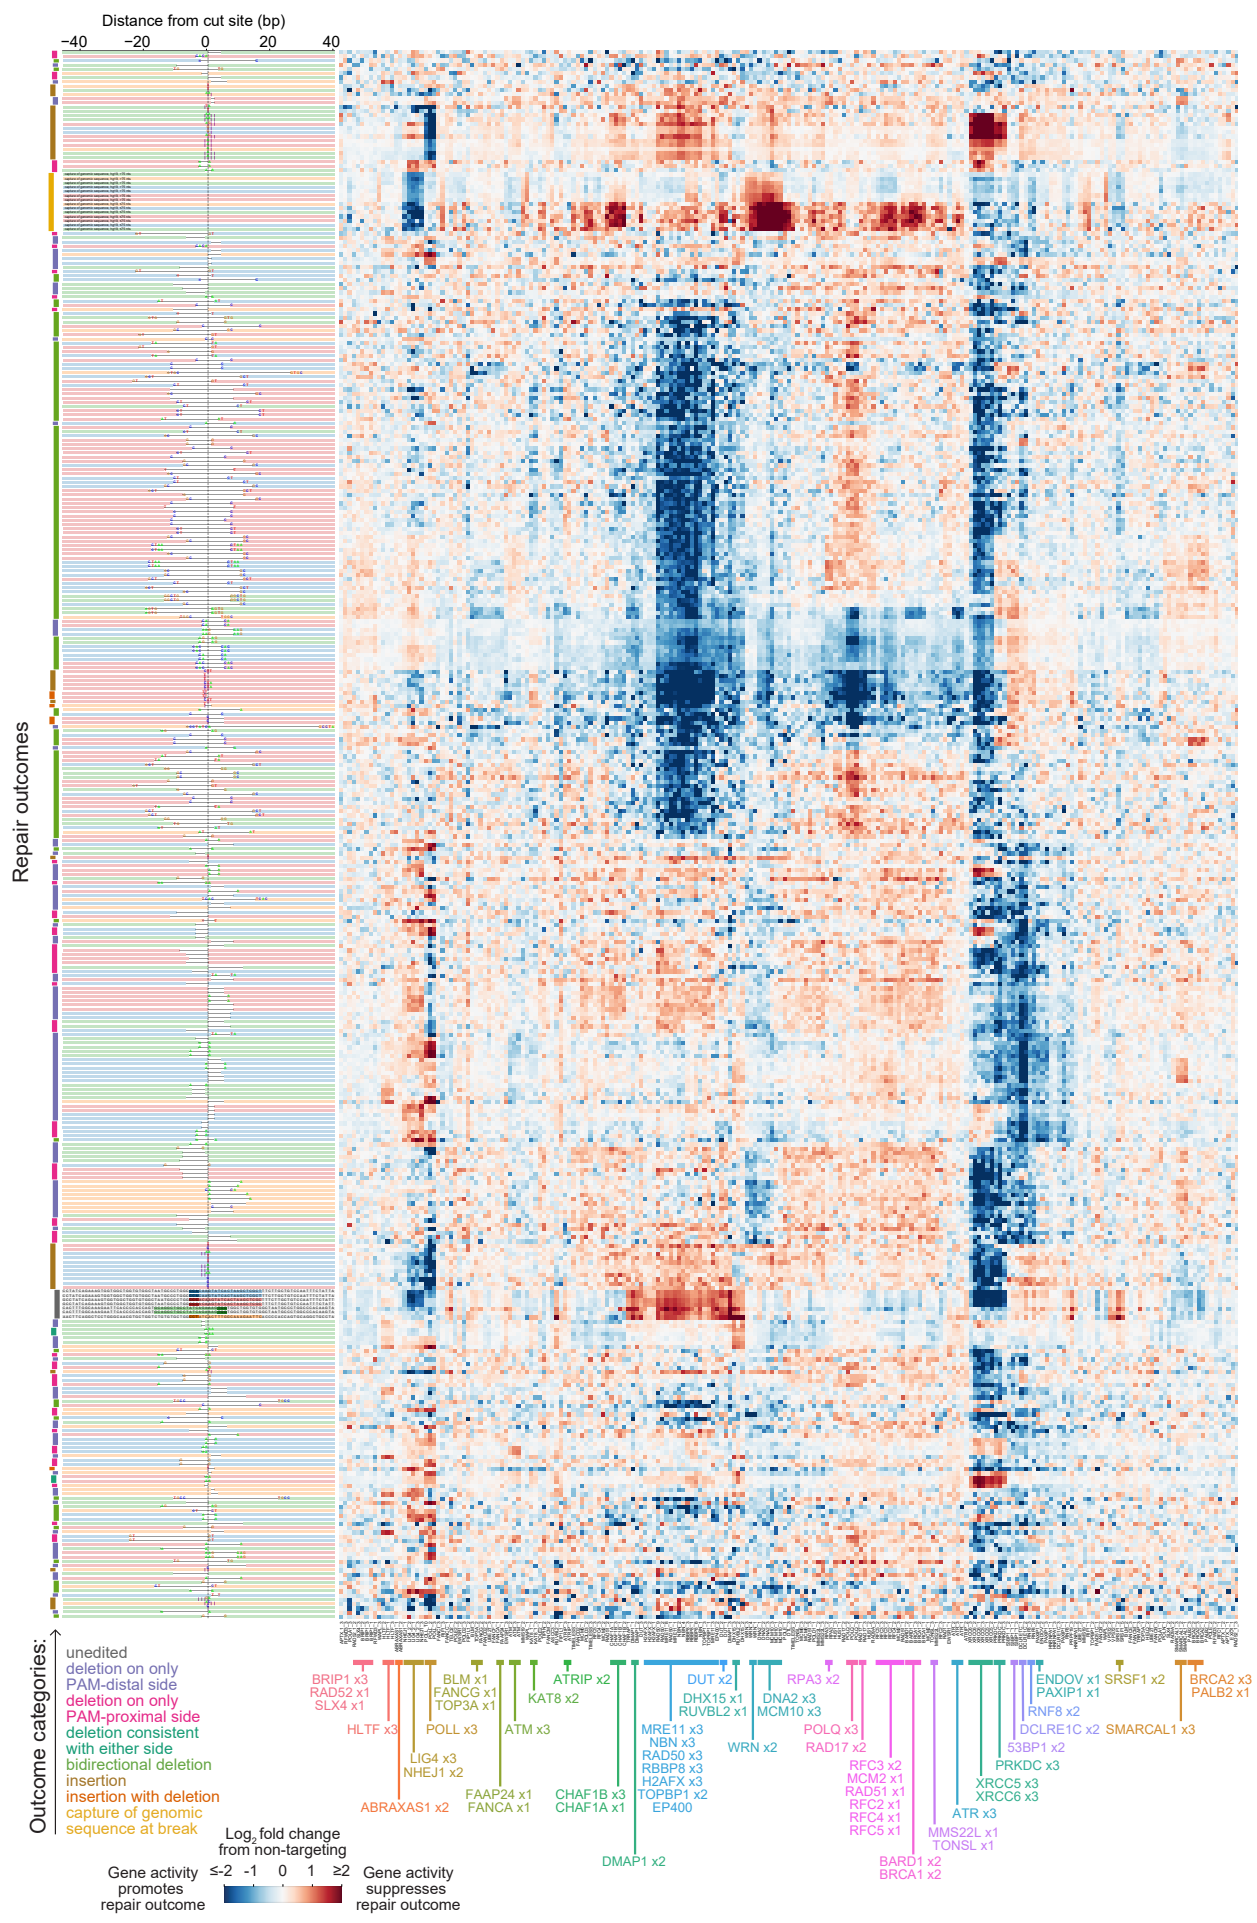

Supplement: NIHMS1750972-supplement-P122.pdf [file NIHMS1750972-supplement-P122.pdf]

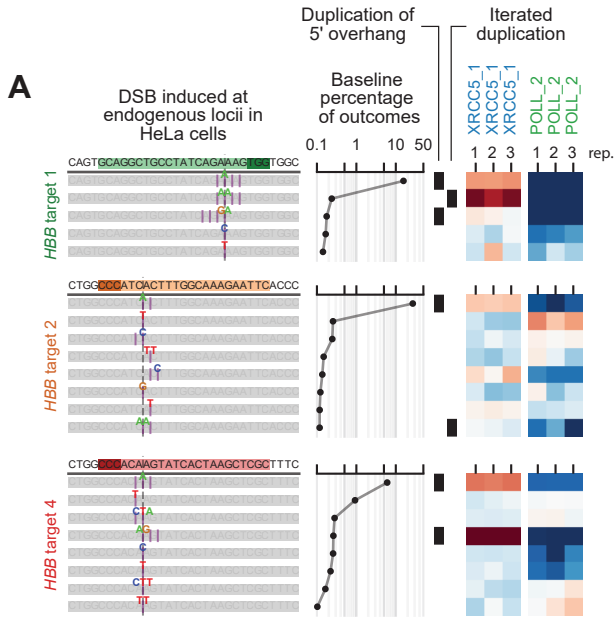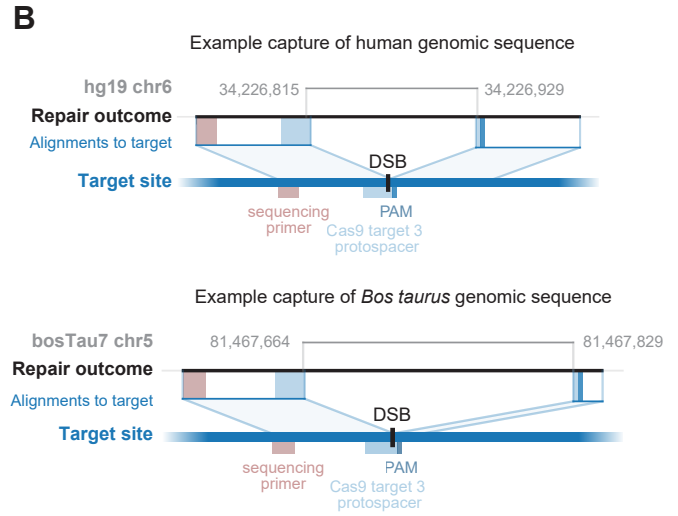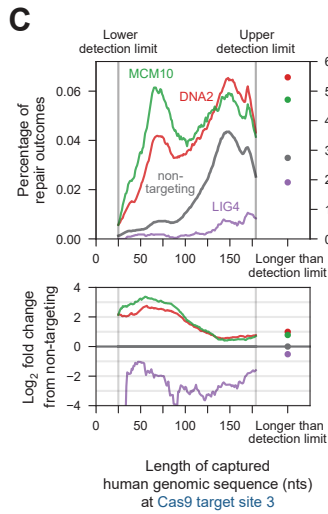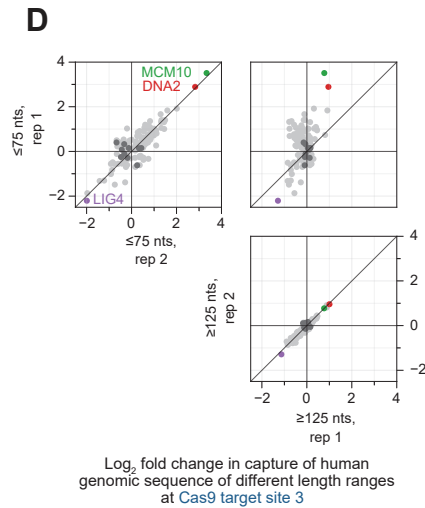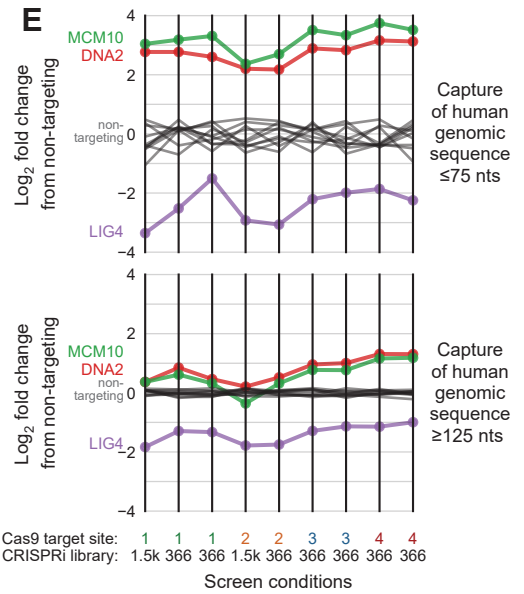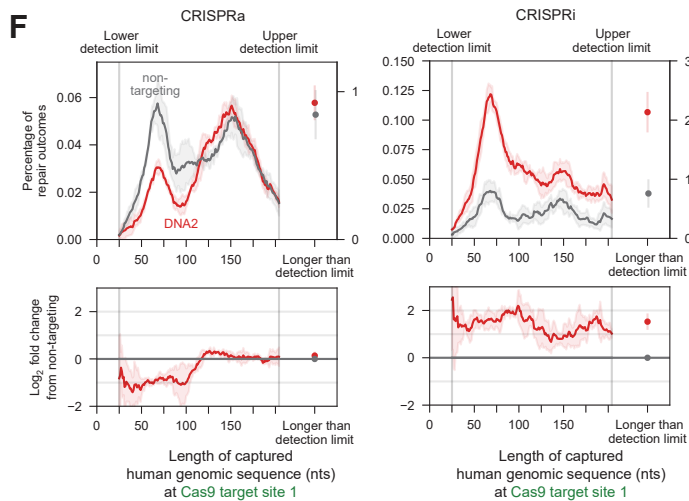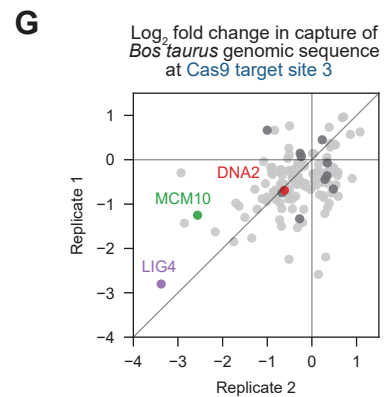

Supplement: NIHMS1750972-supplement-P124.pdf [file NIHMS1750972-supplement-P124.pdf]
